# Supplementary material
Source: PubMed Central journal article supplement (PMC2765929)
Supplement: NIHMS150270-supplement-1.pdf [file NIHMS150270-supplement-1.pdf]

- 35 Lamont RF: The role of infection in preterm labour and birth. *Hosp Med* 2003; 64:644–647.
- 36 Lamont RF: Infection in the prediction and antibiotics in the prevention of spontaneous preterm labour and preterm birth. *BJOG* 2003; 110(Suppl. 20):71–75.
- 37 Hsu CD, Witter FR: Urogenital infection in preeclampsia. *Int J Gynaecol Obstet* 1995; 49:271–275.
- 38 Raynor BD, Bonney EA, Jang KT, Coto W, Garcia MS: Preeclampsia and Chlamydia pneumoniae: is there a link? *Hypertens Pregnancy* 2004; 23:129–134.
- 39 von Dadelszen P, Magee LA: Could an infectious trigger explain the differential maternal response to the shared placental pathology of preeclampsia and normotensive intrauterine growth restriction? *Acta Obstet Gynecol Scand* 2002; 81:642–648.
- 40 Akira S, Uematsu S, Takeuchi O: Pathogen recognition and innate immunity. *Cell* 2006; 124:783–801.
- 41 Ilijevski V, Lu SJ, Hirsch E: Activation of toll-like receptors 2 or 3 and preterm delivery in the mouse. *Reprod Sci* 2007; 14:315–320.
- 42 Zhou R, Wei H, Sun R, Tian Z: Recognition of double-stranded RNA by TLR3 induces severe small intestinal injury in mice. *J Immunol* 2007; 178:4548–4556.
- 43 Murphy SP, Fast LD, Hanna NN, Sharma S: Uterine NK cells mediate inflammation-induced fetal demise in IL-10-null mice. *J Immunol* 2005; 175:4084–4090.
- 44 Kim JS, Romero R, Kim MR, Kim YM, Friel L, Espinoza J, Kim CJ: Involvement of Hofbauer cells and maternal T cells in villitis of unknown aetiology. *Histopathology* 2008; 52:457–464.
- 45 Romero R, Manogue KR, Mitchell MD, Wu YK, Oyarzun E, Hobbins JC, Cerami A: Infection and labor. IV. Cachectin-tumor necrosis factor in the amniotic fluid of women with intraamniotic infection and preterm labor. *Am J Obstet Gynecol* 1989; 161:336–341.
- 46 El-Bastawissi AY, Williams MA, Riley DE, Hitti J, Krieger JN: Amniotic fluid interleukin-6 and preterm delivery: a review. *Obstet Gynecol* 2000; 95:1056–1064.
- 47 Romero R, Ceska M, Avila C, Mazor M, Behnke E, Lindley I: Neutrophil attractant/activating peptide-1/interleukin-8 in term and preterm parturition. *Am J Obstet Gynecol* 1991; 165:813–820.
- 48 Huang SJ, Chen CP, Schatz F, Rahman M, Abrahams VM, Lockwood CJ: Pre-eclampsia is associated with dendritic cell recruitment into the uterine decidua. *J Pathol* 2008; 214:328–336.
- 49 Hansen WR, Keelan JA, Skinner SJ, Mitchell MD: Key enzymes of prostaglandin biosynthesis and metabolism. Coordinate regulation of expression by cytokines in gestational tissues: a review. *Prostaglandins Other Lipid Mediat* 1999; 57:243–257.
- 50 Keelan JA, Blumenstein M, Helliwell RJ, Sato TA, Marvin KW, Mitchell MD: Cytokines, prostaglandins and parturition—a review. *Placenta* 2003; 24(Suppl. A):S33–S46.
- 51 Straszewski-Chavez SL, Visintin IP, Karassina N, Los G, Liston P, Halaban R, Fadiel A, Mor G: XAF1 mediates tumor necrosis factor- $\alpha$ -induced apoptosis and X-linked inhibitor of apoptosis cleavage by acting through the mitochondrial pathway. *J Biol Chem* 2007; 282:13059–13072.
- 52 Mor G, Romero R, Aldo PB, Abrahams VM: Is the trophoblast an immune regulator?: the role of toll-like receptors during pregnancy. *Crit Rev Immunol* 2005; 25:375–388.
- 53 Kato H, Takeuchi O, Sato S, Yoneyama M, Yamamoto M, Matsui K, Uematsu S, Jung A, Kawai T, Ishii KJ, Yamaguchi O, Otsu K, Tsujimura T, Koh CS, Reis CeSousa, Matsuura Y, Fujita T, Akira S: Differential roles of MDA5 and RIG-I helicases in the recognition of RNA viruses. *Nature* 2006; 441:101–105.

### Supporting Information

Additional Supporting Information may be found in the online version of this article:

**Fig. S1.** Poly[I:C] injection induced robust local and systemic inflammatory response in wild type pregnant mice. 4.5 mg/kg Poly[I:C] or PBS was injected i.p. to either wild type mice on 16.5 dpc. Mice were killed after either 2 or 4 hr and placenta and sera were collected. Cytokine/chemokine concentrations in placental lysates (Placenta) and sera (Serum) were measured. Boxes represent the distance between the first (25%) and third (75%) quartiles and horizontal lines in the boxes represent medians. #Significantly higher than PBS-treated mouse.

**Fig. S2.** Poly[I:C] injection failed to induce local and systemic inflammatory response in TLR3 knockout pregnant mice. 4.5 mg/kg Poly[I:C] or PBS was injected i.p. to either wild type (wt) or TLR3 knockout (TLR3KO) mice on 16.5 dpc. Mice were killed after either 2 or 4 hr and placenta and sera were collected. Cytokine/chemokine concentrations in placental lysates (Placenta) and sera (Serum) were measured. Boxes represent the

distance between the first (25%) and third (75%) quartiles and horizontal lines in the boxes represent medians. #Significantly lower than wild type treated mouse, \*Significantly higher than PBS-treated mouse.

Please note: Wiley-Blackwell are not responsible for the content or functionality of any supporting materials supplied by the authors. Any queries (other than missing material) should be directed to the corresponding author for the article.
